# Supplementary material
Source: ML conference proceedings conference paper supplement (https://proceedings.mlr.press/v108/kacham20a.html)
Supplement: Supplementary file [file kacham20a-supp.pdf]

---

# Supplement to “Optimal Deterministic Coresets for Ridge Regression”

---

**Praneeth Kacham**  
Carnegie Mellon University

**David P. Woodruff**  
Carnegie Mellon University

This supplementary document contains the omitted proofs of Lemmas in Section 1 of the main paper. We restate the lemmas and prove them here.

**Lemma 0.1.** *If  $\hat{A}$  is a matrix with orthonormal columns such that  $\text{range}(\hat{A}) = \text{range}\left(\begin{bmatrix} A \\ \sqrt{\lambda}I \end{bmatrix}\right)$  and if  $U_1$  comprises the first  $n$  rows of  $\hat{A}$ , then  $\|U_1\|_F^2 = \text{sd}_\lambda(A)$  and  $\|U_1\|_2^2 = 1/(1 + \lambda/\sigma_1^2) \leq 1$ .*

*Proof.* See Lemma 12 of (Avron et al., 2017) for a proof. □

**Lemma 0.2.** *If  $A'$  is the sub-matrix of  $A$  formed by taking rows of  $A$ , then  $\text{sd}_\lambda(A') \leq \text{sd}_\lambda(A)$ .*

*Proof.* The minimax characterization of singular values is as follows:

$$\sigma_i(A) = \max_{U: \dim(U)=i} \min_{x \in U: \|x\|_2=1} \|Ax\|_2 \tag{0.1}$$

For any vector  $x$ , we have  $\|A'x\|_2 \leq \|Ax\|_2$  (Since, vector  $Ax$  has all the elements of  $A'x$  and more). Hence, for any subspace  $U$ ,  $\min_{x \in U: \|x\|_2=1} \|A'x\| \leq \min_{x \in U: \|x\|_2=1} \|Ax\|_2$ . Now, it is easy to see that

$$\begin{aligned} \max_{U: \dim(U)=i} \min_{x \in U: \|x\|_2=1} \|A'x\|_2 &\leq \\ \max_{U: \dim(U)=i} \min_{x \in U: \|x\|_2=1} \|Ax\|_2 & \\ \implies \sigma_i(A') &\leq \sigma_i(A) \end{aligned} \tag{0.2}$$

Now,

$$\begin{aligned} \text{sd}_\lambda(A') &= \sum_{i=1}^{\text{rank}(A')} \frac{1}{1 + \lambda/\sigma_i(A')^2} \\ &\leq \sum_{i=1}^{\text{rank}(A')} \frac{1}{1 + \lambda/\sigma_i(A)^2} \quad (\text{Using (0.2)}) \\ &\leq \sum_{i=1}^{\text{rank}(A)} \frac{1}{1 + \lambda/\sigma_i(A)^2} \\ &= \text{sd}_\lambda(A) \end{aligned} \tag{0.2}$$

**Lemma 0.3.** *For any  $r \geq 1$ ,  $\text{sd}_{\lambda/r}(A) \leq \min(r \cdot \text{sd}_\lambda(A), \text{rank}(A))$ .*

*Proof.* By definition of statistical dimension,  $\text{sd}_\lambda(A) \leq \text{rank}(A)$ . We also have for all  $r \geq 1$ ,  $1/(1 + \lambda/r\sigma_i^2) \leq r/(1 + \lambda/\sigma_i^2)$ . By summing the inequality for all  $i$ , we get  $\text{sd}_{\lambda/r}(A) \leq r \cdot \text{sd}_\lambda(A)$ . □

## References

Haim Avron, Kenneth L. Clarkson, and David P. Woodruff. Sharper bounds for regularized data fitting. In *Approximation, Randomization, and Combinatorial Optimization. Algorithms and Techniques, APPROX/RANDOM 2017, August 16-18, 2017, Berkeley, CA, USA*, pages 27:1–27:22, 2017. doi: 10.4230/LIPIcs.APPROX-RANDOM.2017.27. URL <https://doi.org/10.4230/LIPIcs.APPROX-RANDOM.2017.27>.
